# Supplementary material
Source: publisher figshare collection journal article supplement (https://karger.figshare.com/articles/dataset/_/5127583)
Supplement: Supplementary file 1 [file 1]

**Dietary fat quality** (translated from Finnish version (2010), created by Finnish Heart Association)

Choose the option, which reflects best of your diet.

1. I usually spread on my bread...
  - butter or blended spread (*e.g., Oivariini, Lahden leipälevite, Makuisa.*) 0
  - margarine  $\geq 60\%$  (*e.g., Becel, Keiju, Flora*) 6
  - low-fat blend with vegetable fat (*e.g., Light Becel, Becel Pro Activ, Benecol, Oivariini Balansia*) 6
  - blend  $\leq 40\%$  (*e.g., Light Levi*). 3
  - nothing 0
  
2. I usually choose on my bread...
  - cream cheese (*e.g., Turunmaa, Oltermanni*), edam- or emmental cheese, or processed cheese (*fat content over 17 %, e.g., Olympia, Koskenlaskija*) 0
  - low-fat cheese or low-fat processed cheese (*fat content not more than 17 %, e.g., Oltermanni 17%, Kadett*) 1
  - cheese with vegetable fat (*e.g., Julia, Julius, Oliivi Edami, Omega Edami*) 2
  - I don't use cheese 2
  
3. I usually use cold cuts, which are...
  - salami 0
  - sausages (*e.g., Balkan or Lauantai, sausage liver, or lenkki*) 0
  - low-fat cold cuts (*fat content about 10%*) 1
  - ham, turkey cold cuts, cooked ham, or aspic 2
  - I don't use cold cuts 2
  
4. I eat fatty foods at the main meal (*e.g., lasagne, pizza, sausage or fatty meat sauce*)...
  - almost a daily 0
  - couple times in a week 1
  - about once in a week, rarely, or not at all 3
  
5. I drink or eat dairy products, which are...
  - mostly fatty dairy products (*e.g., A-sour milk, Bulgarian yoghurt, soured whole milk, or whole milk*) 0
  - mostly low-fat dairy products (*e.g., light milk and light soured whole milk*) 1
  - mostly non-fat or very low-fat dairy products (*e.g., skimmed milk or fat-free yoghurt or vegetable yoghurt*) 3
  - I don't use dairy products 3

6. I use or eat foods, which are cooked by using...
- cooking oil or fluid margarine 2
  - margarine in container 2
  - margarine for baking 1
  - butter or blend 0
  - I do not use margarine/butter/oil 2
7. I use or eat foods and pastries, which are cooked by using...
- cream, sour cream (*fat content over 15%*) 0
  - low-fat options of cream and sour cream (*fat content not more than 15%, e.g., light sour cream, Crème Bonjour Cuisine*) 1
  - cream for food preparation, with vegetable fat (*e.g., Becel 7%, Flora 7%, GoGreen*) 2
  - I don't use cooking creams or products 2
8. I usually use salad dressings, which are...
- dressing, with vegetable fat (*e.g., french dressing or mustard dressing*) 4
  - mayonnaise (*e.g., Rhode Island*) 3
  - sour cream or yoghurt dressing 0
  - soft dressing or not at all 0
9. I eat pastries or other fatty foods (*e.g., Danish pastries, cakes, pies, chocolates, ice cream*)
- a daily or almost a daily 0
  - a couple times in a week 1
  - once in a week or rarely 3
