# Supplementary material
Source: publisher figshare collection journal article supplement (https://karger.figshare.com/articles/dataset/_/5127583)
Supplement: Supplementary file 2 [file 1]

Archive with 4 entries (4 files):
- 000371743_sm_Appendix_1.pdf
- 000371743_sm_Appendix_2.pdf
- 000371743_sm_Appendix_3.pdf
- 000371743_sm_Appendix_4.pdf
