# Supplementary material
Source: publisher figshare collection journal article supplement (https://karger.figshare.com/articles/dataset/_/5127583)
Supplement: Supplementary file 2 [file 1 › 000371743_sm_Appendix_2.pdf]

Table. Health messages (2<sup>nd</sup> communication).

| Group         | Based                                                                                                                 | Model                                               | Specific Risk | Aim                                                                                                                                                                             | Example                                                                                                                                                                                               |
|---------------|-----------------------------------------------------------------------------------------------------------------------|-----------------------------------------------------|---------------|---------------------------------------------------------------------------------------------------------------------------------------------------------------------------------|-------------------------------------------------------------------------------------------------------------------------------------------------------------------------------------------------------|
| $\epsilon 4+$ | <i>apoE</i> genotype 3/4 or 4/4                                                                                       | Extended Parallel Process Model (EPPM) (Witte 2001) | CVD           | To emphasize the importance of the genotype on influencing dietary changes (e.g., improvement of fat quality) and increasing exercise to lower cholesterol level to prevent CVD | "...you have <i>apoE</i> 3/4 genotype, which means that you have hereditary higher cholesterol and bigger risk to get CVD, but especially YOUR cholesterol has good response to lifestyle changes..." |
| $\epsilon 4-$ | <i>apoE</i> genotype 3/3, 2/3 or 2/2                                                                                  | Extended Parallel Process Model (EPPM) (Witte 2001) | CVD           | To emphasize the interaction between environmental factors and the genotype and highlight the significance of the individuals' own lifestyle.                                   | "...your <i>apoE</i> genotype doesn't increase risk to higher cholesterol and CVD, but <i>apoE</i> is only ONE factor - your own lifestyle has big weight preventing CVD..."                          |
| Control       | general health and nutrition recommendations and studies from the National Institute for Health and Welfare, Finland. | -                                                   | CVD           | To give general health information on lifestyle and CVD risk.                                                                                                                   | "...genome may predispose to CVD, but healthy diet, regular physical activity, minor alcohol consumption and maintenance normal BMI lower clearly the CVD risk..."                                    |
