# Supplementary material
Source: publisher figshare collection journal article supplement (https://karger.figshare.com/articles/dataset/_/5127583)
Supplement: Supplementary file 2 [file 1 › 000371743_sm_Appendix_4.pdf]

**Consumption of foods containing excessive fat and sugar**

How many times in a week do you consume foods, which are in the list below? Please fill your eating times on the line.

- a) \_\_\_\_\_ times pizza, hamburger, kebab?
- b) \_\_\_\_\_ times salty pastries (*e.g.* ,meat pies, Karelian pies)?
- c) \_\_\_\_\_ times salty snacks (*e.g.*, potato chips, pop corns, salty peanuts)?
- d) \_\_\_\_\_ times sweet pastries (*e.g.*, biscuits, cakes, Danish pastries)?
- f) \_\_\_\_\_ times chocolates?
- g) \_\_\_\_\_ times candies?
- h) \_\_\_\_\_ times sweetened juice?
- i) \_\_\_\_\_ times sweetened soft drinks (*e.g.*, Coca-Cola<sup>®</sup>, Fanta<sup>®</sup>, Sprite<sup>®</sup>)
